# Supplementary material
Source: PubMed Central journal article supplement (PMC166437)
Supplement: pnas_1032999100_3.pdf [file pnas_1032999100_3.pdf]

1: *Zea mexicana*  
2: *Zea mexicana*  
3: *Zea parviglumis*  
4: *Zea parviglumis*  
5: A188  
6: A654  
7: **BSSS53**  
8: W23  
9: W22  
10: W64A  
11: III12E  
12: A632  
13: A636  
14: B37  
15: **B73**  
16: Mo17  
17: *Zea luxurians*  
18: *Zea luxurians*  
19: 1kb ladder  
20:  $\lambda$  HindIII ladder

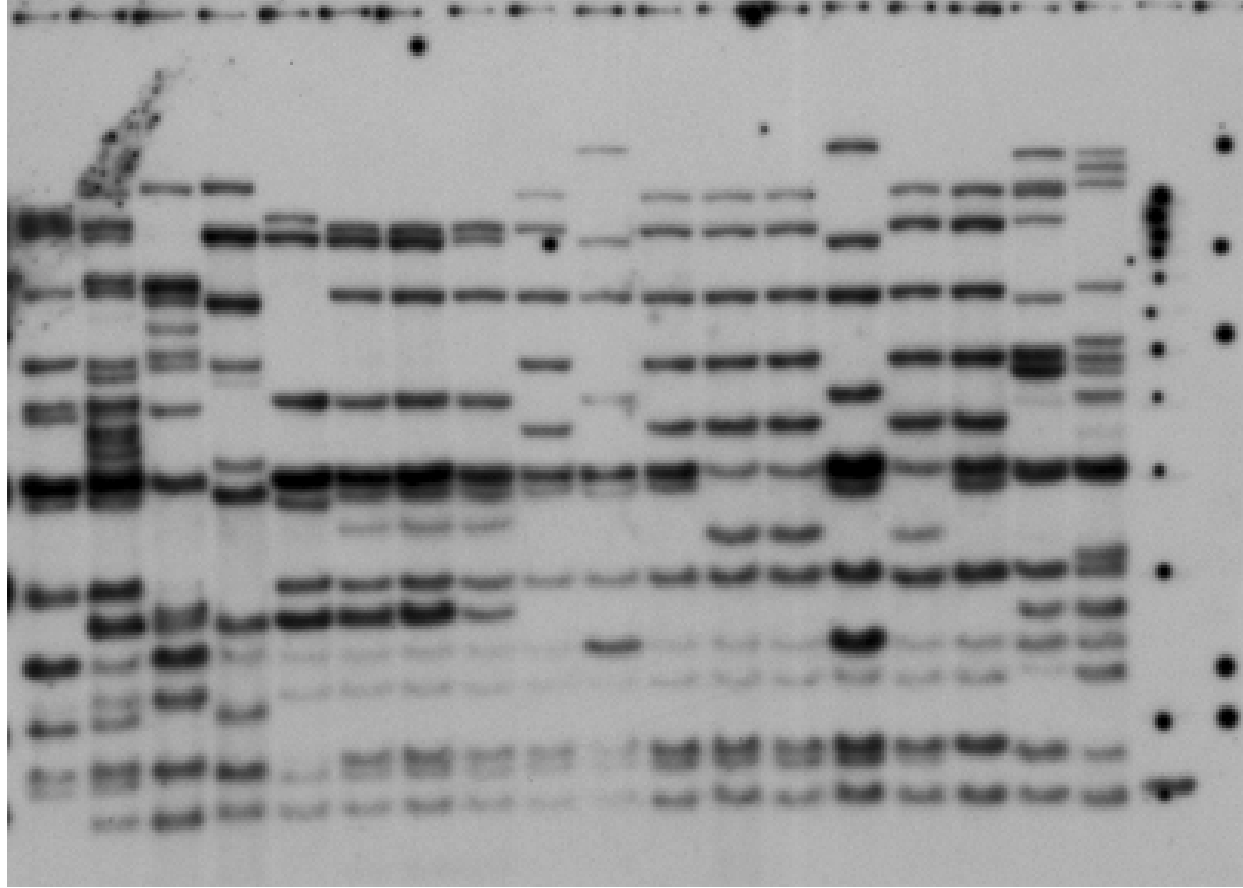

— 23.1 kb  
— 12.0  
— 9.4  
— 7.0  
— 6.0  
— 5.0  
— 4.0  
— 3.0  
— 2.0  
— 1.6
