# Supplementary material
Source: PubMed Central journal article supplement (PMC166437)

**A. *php200725***

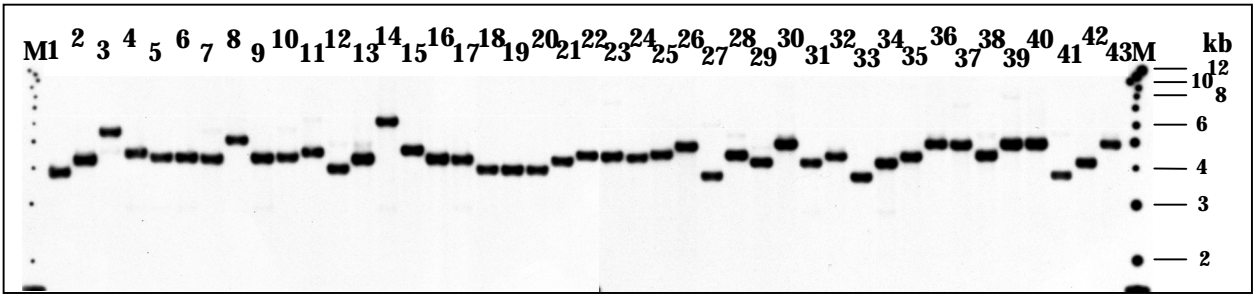

**B. *azs22;13***

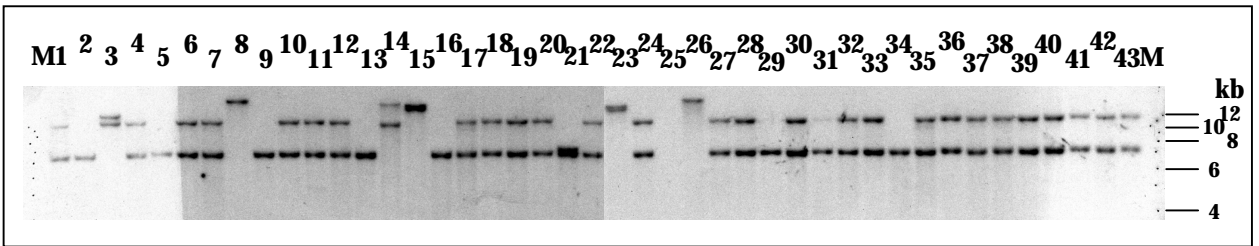

**C. *ORF3***

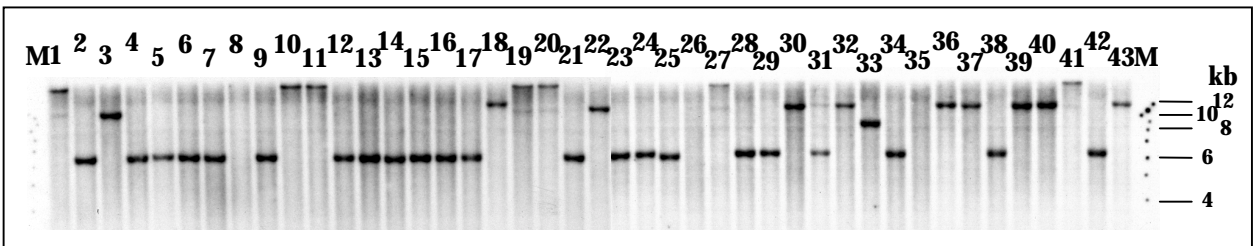

**D. mixed z1C genes**

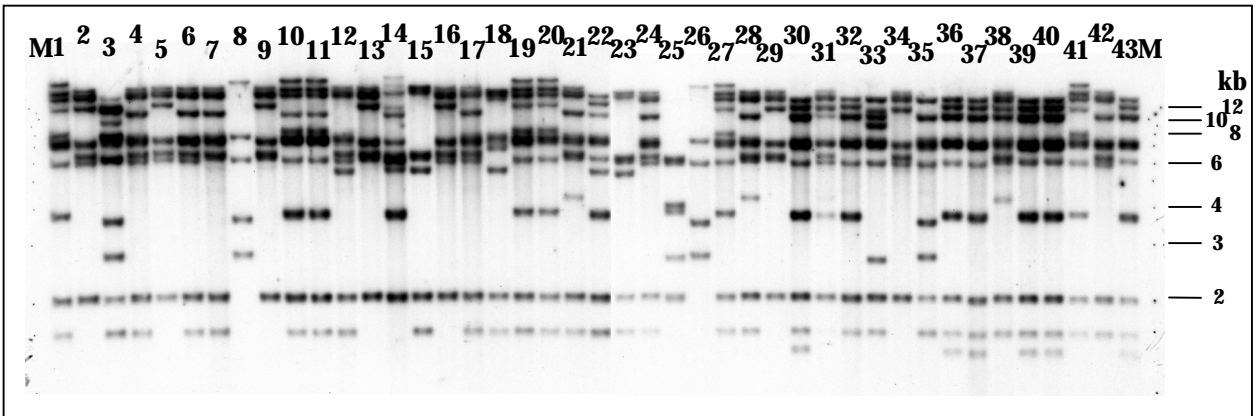

Supplement: pnas_1032999100_7.pdf [file pnas_1032999100_7.pdf]
